# Supplementary material for: Blood microRNA Signatures Serve as Potential Diagnostic Biomarkers for Hepatic Sinusoidal Obstruction Syndrome Caused by Gynura japonica Containing Pyrrolizidine Alkaloids
Source: PubMed Central journal article supplement (PMC7933570; doi:10.3389/fphar.2021.627126), 2021-02-19

## **Supplemental tables**

**Supplemental Table 1.** Sequences of the primers used for RT-qPCR.

**Supplemental Table 2.** Validation of the 8 differentially expressed miRNAs in healthy donors and PA-HSOS patients by RT-qPCR.

**Supplemental Table 3.** ROC curve analysis for the discrimination between healthy donors and PA-HSOS patients by the three miRNA biomarkers.

**Supplemental Table 4.** Top 30 GO annotations for genes targeted by the differentially expressed miRNAs.

**Supplemental Table 5.** Top 30 KEGG pathways for genes targeted by the differentially expressed miRNAs.

**Supplementary Table 6.** The intersection between 3 potential miRNAs biomarkers and angiogenesis pathway genes.

**Supplementary Table 1.** Sequences of the primers used for RT-qPCR.

| Systematic Name        | Sequence (5'-3')       | Accession number |
|------------------------|------------------------|------------------|
| <i>hsa-miR-140-5p</i>  | CAGCAGTGGTTTTACCCTATG  | MIMAT0000431     |
| <i>hsa-miR-148a-3p</i> | GCAGTCAGTGCACTACAGA    | MIMAT0000243     |
| <i>hsa-miR-17-3p</i>   | CTGCAGTGAAGGCACTT      | MIMAT0000071     |
| <i>hsa-miR-185-5p</i>  | CAGTGGAGAGAAAGGCAGT    | MIMAT0000455     |
| <i>hsa-miR-194-5p</i>  | CAGTGTAACAGCAACTCCA    | MIMAT0000460     |
| <i>hsa-miR-19b-3p</i>  | AGTGTGCAAATCCATGCAA    | MIMAT0000074     |
| <i>hsa-miR-29b-3p</i>  | CAGTAGCACCATTTGAAATCAG | MIMAT0000100     |
| <i>hsa-miR-29c-3p</i>  | CAGTAGCACCATTTGAAATCG  | MIMAT0000681     |
| <i>hsa-miR-362-5p</i>  | CGCAGAATCCTTGGAACCT    | MIMAT0000705     |
| <i>hsa-miR-3653-3p</i> | CGCAGCTAAGAAGTTGAC     | MIMAT0018073     |
| <i>hsa-miR-4685-5p</i> | CCCAGGGCTTGGAGTG       | MIMAT0019771     |
| <i>hsa-miR-7114-5p</i> | GTCTGTGGAGTGGGGT       | MIMAT0028125     |

**Supplemental Table 2.** Validation of the 8 differentially expressed miRNAs in healthy donors and PA-HSOS patients by RT-qPCR.

| Systematic Name        | HSOS patients in cohort 1 (n=9) |                |                        | HSOS patients in cohort 2 (n=20) |                |                        |
|------------------------|---------------------------------|----------------|------------------------|----------------------------------|----------------|------------------------|
|                        | Fold change                     | <i>p</i> value | <i>p</i> value summary | Fold change                      | <i>p</i> value | <i>p</i> value summary |
| <i>hsa-miR-148a-3p</i> | 4.7                             | 0.0080         | **                     | 2.9                              | 0.0089         | **                     |
| <i>hsa-miR-194-5p</i>  | 4.2                             | 0.0168         | *                      | 2.5                              | 0.0082         | **                     |
| <i>hsa-miR-29b-3p</i>  | 3.6                             | 0.0003         | ***                    | 1.7                              | 0.0131         | *                      |
| <i>hsa-miR-185-5p</i>  | 3.2                             | 0.0014         | **                     | 1.9                              | 0.0067         | **                     |
| <i>hsa-miR-424-5p</i>  | 3.0                             | 0.0057         | **                     | 1.9                              | 0.0293         | *                      |
| <i>hsa-miR-140-5p</i>  | 2.7                             | 0.0244         | *                      | 1.9                              | 0.0299         | *                      |
| <i>hsa-miR-29c-3p</i>  | 2.6                             | 0.0199         | *                      | 1.9                              | 0.0165         | *                      |
| <i>hsa-miR-362-5p</i>  | 2.5                             | 0.0141         | *                      | 2.5                              | 0.0020         | **                     |

Data were analyzed by Student's t test and expressed as mean±SD. \**p*<0.05, \*\**p*<0.01, \*\*\**p*<0.001 versus healthy donors.

**Supplemental Table 3.** ROC curve analysis for the discrimination between healthy donors and PA-HSOS patients by the three miRNA biomarkers.

| Index          | HSOS patients in cohort 1 (n=9) |                       |                       | HSOS patients in cohort 2 (n=20) |                       |                       |
|----------------|---------------------------------|-----------------------|-----------------------|----------------------------------|-----------------------|-----------------------|
|                | <i>hsa-miR-148a-3p</i>          | <i>hsa-miR-362-5p</i> | <i>hsa-miR-194-5p</i> | <i>hsa-miR-148a-3p</i>           | <i>hsa-miR-362-5p</i> | <i>hsa-miR-194-5p</i> |
| AUC            | 0.926                           | 0.877                 | 0.938                 | 0.900                            | 0.900                 | 0.933                 |
| (95 % CI)      | (0.80; 1.00)                    | (0.70; 1.00)          | (0.83; 1.00)          | (0.80; 1.00)                     | (0.75; 1.00)          | (0.82;1.00)           |
| Sensitivity %  | 100.00                          | 100.00                | 100.00                | 70.00                            | 100.00                | 75.00                 |
| Specificity %  | 77.78                           | 77.78                 | 77.78                 | 100.00                           | 66.67                 | 100.00                |
| Standard error | 0.07                            | 0.09                  | 0.05                  | 0.06                             | 0.07                  | 0.05                  |
| Youden Index   | 0.778                           | 0.778                 | 0.778                 | 0.70                             | 0.67                  | 0.75                  |

AUC, area under curve; Youden's index=sensitivity+specificity-1.

**Supplemental Table 4.** Top 30 GO annotations for genes targeted by 3 potential miRNAs biomarkers.

| GO_ID                  | Description                                                            | Type               | P value  | q value  | Enrich factor |
|------------------------|------------------------------------------------------------------------|--------------------|----------|----------|---------------|
| <i>hsa-miR-148a-3p</i> |                                                                        |                    |          |          |               |
| GO:0002040             | sprouting angiogenesis                                                 | biological_process | 2.49E-06 | 1.69E-04 | 6.67          |
| GO:0016441             | posttranscriptional gene silencing                                     | biological_process | 2.96E-06 | 1.89E-04 | 7.44          |
| GO:0035194             | posttranscriptional gene silencing by RNA                              | biological_process | 2.96E-06 | 1.89E-04 | 7.44          |
| GO:0008038             | neuron recognition                                                     | biological_process | 1.59E-06 | 1.25E-04 | 9.51          |
| GO:0035195             | gene silencing by miRNA                                                | biological_process | 1.09E-05 | 5.06E-04 | 7.24          |
| GO:0021795             | cerebral cortex cell migration                                         | biological_process | 1.79E-05 | 7.54E-04 | 6.76          |
| GO:0002042             | cell migration involved in sprouting angiogenesis                      | biological_process | 1.37E-05 | 6.15E-04 | 8.32          |
| GO:0040036             | regulation of fibroblast growth factor receptor signaling pathway      | biological_process | 4.25E-05 | 1.51E-03 | 8.45          |
| GO:0060612             | adipose tissue development                                             | biological_process | 9.11E-05 | 2.84E-03 | 7.36          |
| GO:0090207             | regulation of triglyceride metabolic process                           | biological_process | 1.09E-04 | 3.24E-03 | 7.13          |
| GO:0016442             | RISC complex                                                           | cellular_component | 5.50E-06 | 3.07E-04 | 17.28         |
| GO:0070884             | regulation of calcineurin-NFAT signaling cascade                       | biological_process | 6.59E-05 | 2.16E-03 | 10.01         |
| GO:0032878             | regulation of establishment or maintenance of cell polarity            | biological_process | 1.05E-04 | 3.18E-03 | 9.05          |
| GO:0033173             | calcineurin-NFAT signaling cascade                                     | biological_process | 3.46E-04 | 7.73E-03 | 7.04          |
| GO:0021799             | cerebral cortex radially oriented cell migration                       | biological_process | 5.70E-04 | 1.14E-02 | 6.34          |
| GO:0035068             | micro-ribonucleoprotein complex                                        | cellular_component | 1.51E-05 | 6.63E-04 | 21.73         |
| GO:0035278             | negative regulation of translation involved in gene silencing by miRNA | biological_process | 3.65E-05 | 1.34E-03 | 16.9          |
| GO:0048268             | clathrin coat assembly                                                 | biological_process | 1.06E-04 | 3.17E-03 | 12.67         |
| GO:0031061             | negative regulation of histone methylation                             | biological_process | 2.48E-04 | 6.32E-03 | 10.14         |
| GO:0021542             | dentate gyrus development                                              | biological_process | 3.19E-04 | 7.48E-03 | 9.51          |
| GO:0007413             | axonal fasciculation                                                   | biological_process | 6.25E-04 | 1.24E-02 | 8             |
| GO:0005942             | phosphatidylinositol 3-kinase complex                                  | cellular_component | 6.25E-04 | 1.24E-02 | 8             |
| GO:0005545             | 1-phosphatidylinositol binding                                         | molecular_function | 7.65E-04 | 1.42E-02 | 7.6           |
| GO:0031290             | retinal ganglion cell axon guidance                                    | biological_process | 7.65E-04 | 1.42E-02 | 7.6           |
| GO:2000209             | regulation of anoikis                                                  | biological_process | 7.65E-04 | 1.42E-02 | 7.6           |
| GO:0048103             | somatic stem cell division                                             | biological_process | 1.11E-03 | 1.73E-02 | 6.91          |
| GO:0035196             | production of miRNAs involved in gene silencing by miRNA               | biological_process | 1.11E-03 | 1.73E-02 | 6.91          |
| GO:0043567             | regulation of insulin-like growth factor                               | biological_process | 1.57E-03 | 2.13E-02 | 6.34          |

|            |                                                        |                    |          |          |       |
|------------|--------------------------------------------------------|--------------------|----------|----------|-------|
|            | receptor signaling pathway                             |                    |          |          |       |
| GO:0043276 | anoikis                                                | biological_process | 1.57E-03 | 2.13E-02 | 6.34  |
| GO:0060216 | definitive hemopoiesis                                 | biological_process | 1.57E-03 | 2.13E-02 | 6.34  |
|            | <i>hsa-miR-362-5p</i>                                  |                    |          |          |       |
| GO:0007155 | cell adhesion                                          | biological_process | 9.38E-04 | 9.56E-03 | 3.16  |
| GO:0048514 | blood vessel morphogenesis                             | biological_process | 2.31E-04 | 6.20E-03 | 4.98  |
| GO:0001568 | blood vessel development                               | biological_process | 5.31E-04 | 7.28E-03 | 4.39  |
| GO:0001944 | vasculature development                                | biological_process | 6.85E-04 | 8.21E-03 | 4.22  |
| GO:0016337 | single organismal cell-cell adhesion                   | biological_process | 1.46E-04 | 5.36E-03 | 6.19  |
| GO:0030155 | regulation of cell adhesion                            | biological_process | 2.26E-04 | 6.16E-03 | 5.76  |
| GO:0004674 | protein serine/threonine kinase activity               | molecular_function | 4.10E-03 | 2.03E-02 | 3.94  |
| GO:0010256 | endomembrane system organization                       | biological_process | 4.73E-03 | 2.24E-02 | 3.82  |
| GO:0043547 | positive regulation of GTPase activity                 | biological_process | 6.33E-03 | 2.58E-02 | 3.6   |
| GO:0045664 | regulation of neuron differentiation                   | biological_process | 7.05E-03 | 2.75E-02 | 3.52  |
| GO:0043087 | regulation of GTPase activity                          | biological_process | 1.06E-02 | 3.52E-02 | 3.23  |
| GO:0030036 | actin cytoskeleton organization                        | biological_process | 1.10E-02 | 3.61E-02 | 3.21  |
| GO:0009143 | nucleoside triphosphate catabolic process              | biological_process | 1.16E-02 | 3.75E-02 | 3.17  |
| GO:0046130 | purine ribonucleoside catabolic process                | biological_process | 1.19E-02 | 3.83E-02 | 3.15  |
| GO:0021510 | spinal cord development                                | biological_process | 2.90E-05 | 1.10E-02 | 13.97 |
| GO:0021953 | central nervous system neuron differentiation          | biological_process | 3.43E-04 | 6.11E-03 | 8.13  |
| GO:0060537 | muscle tissue development                              | biological_process | 1.05E-02 | 3.51E-02 | 3.69  |
| GO:0048589 | developmental growth                                   | biological_process | 1.09E-02 | 3.61E-02 | 3.66  |
| GO:0043025 | neuronal cell body                                     | cellular_component | 1.14E-02 | 3.73E-02 | 3.62  |
| GO:0032869 | cellular response to insulin stimulus                  | biological_process | 1.25E-02 | 3.92E-02 | 3.54  |
| GO:0030900 | forebrain development                                  | biological_process | 1.36E-02 | 4.15E-02 | 3.47  |
| GO:0048011 | neurotrophin TRK receptor signaling pathway            | biological_process | 1.38E-02 | 4.21E-02 | 3.45  |
| GO:0051493 | regulation of cytoskeleton organization                | biological_process | 1.41E-02 | 4.27E-02 | 3.43  |
| GO:0038179 | neurotrophin signaling pathway                         | biological_process | 1.43E-02 | 4.29E-02 | 3.42  |
| GO:0030425 | dendrite                                               | cellular_component | 1.47E-02 | 4.39E-02 | 3.4   |
| GO:0001525 | angiogenesis                                           | biological_process | 1.48E-02 | 4.42E-02 | 3.39  |
| GO:0071900 | regulation of protein serine/threonine kinase activity | biological_process | 1.81E-02 | 5.02E-02 | 3.22  |
| GO:0032868 | response to insulin                                    | biological_process | 1.92E-02 | 5.24E-02 | 3.18  |
| GO:0044297 | cell body                                              | cellular_component | 1.92E-02 | 5.24E-02 | 3.18  |
| GO:0072657 | protein localization to membrane                       | biological_process | 1.93E-02 | 5.26E-02 | 3.17  |
|            | <i>hsa-miR-194-5p</i>                                  |                    |          |          |       |
| GO:0007030 | Golgi organization                                     | biological_process | 4.93E-07 | 3.19E-04 | 8.7   |
| GO:0001838 | embryonic epithelial tube formation                    | biological_process | 8.57E-06 | 1.75E-03 | 6.19  |
| GO:0072175 | epithelial tube formation                              | biological_process | 9.16E-06 | 1.78E-03 | 6.14  |
| GO:0035148 | tube formation                                         | biological_process | 2.18E-05 | 2.22E-03 | 5.53  |
| GO:0001843 | neural tube closure                                    | biological_process | 3.68E-06 | 1.02E-03 | 7.91  |
| GO:0001841 | neural tube formation                                  | biological_process | 1.42E-05 | 2.12E-03 | 6.62  |

|            |                                                                                  |                    |          |          |      |
|------------|----------------------------------------------------------------------------------|--------------------|----------|----------|------|
| GO:0033116 | endoplasmic reticulum-Golgi intermediate compartment membrane                    | cellular_component | 1.85E-05 | 2.18E-03 | 9.06 |
| GO:0017053 | transcriptional repressor complex                                                | cellular_component | 6.30E-05 | 3.94E-03 | 7.37 |
| GO:0006476 | protein deacetylation                                                            | biological_process | 1.02E-04 | 5.52E-03 | 6.79 |
| GO:0001948 | glycoprotein binding                                                             | molecular_function | 4.25E-04 | 1.17E-02 | 5.32 |
| GO:0005793 | endoplasmic reticulum-Golgi intermediate compartment                             | cellular_component | 4.51E-04 | 1.22E-02 | 5.27 |
| GO:0003158 | endothelium development                                                          | biological_process | 4.78E-04 | 1.21E-02 | 5.21 |
| GO:0048066 | developmental pigmentation                                                       | biological_process | 6.65E-05 | 4.10E-03 | 9.15 |
| GO:0016575 | histone deacetylation                                                            | biological_process | 3.48E-04 | 1.06E-02 | 6.62 |
| GO:0051149 | positive regulation of muscle cell differentiation                               | biological_process | 3.76E-04 | 1.09E-02 | 6.52 |
| GO:0070603 | SWI/SNF superfamily-type complex                                                 | cellular_component | 6.25E-04 | 1.44E-02 | 5.89 |
| GO:1901800 | positive regulation of proteasomal protein catabolic process                     | biological_process | 9.27E-04 | 1.44E-02 | 5.44 |
| GO:0046915 | transition metal ion transmembrane transporter activity                          | molecular_function | 2.13E-04 | 8.09E-03 | 9.56 |
| GO:0060563 | neuroepithelial cell differentiation                                             | biological_process | 3.00E-04 | 9.93E-03 | 8.82 |
| GO:0046928 | regulation of neurotransmitter secretion                                         | biological_process | 6.06E-04 | 1.43E-02 | 7.48 |
| GO:0060425 | lung morphogenesis                                                               | biological_process | 9.40E-04 | 1.45E-02 | 6.75 |
| GO:0021879 | forebrain neuron differentiation                                                 | biological_process | 1.29E-03 | 1.73E-02 | 6.26 |
| GO:0051219 | phosphoprotein binding                                                           | molecular_function | 1.62E-03 | 1.71E-02 | 5.93 |
| GO:0000118 | histone deacetylase complex                                                      | cellular_component | 1.74E-03 | 1.81E-02 | 5.83 |
| GO:1901888 | regulation of cell junction assembly                                             | biological_process | 1.87E-03 | 1.90E-02 | 5.74 |
| GO:0032922 | circadian regulation of gene expression                                          | biological_process | 1.87E-03 | 1.90E-02 | 5.74 |
| GO:0021872 | forebrain generation of neurons                                                  | biological_process | 2.29E-03 | 2.21E-02 | 5.46 |
| GO:0032436 | positive regulation of proteasomal ubiquitin-dependent protein catabolic process | biological_process | 2.61E-03 | 2.14E-02 | 5.29 |
| GO:0048041 | focal adhesion assembly                                                          | biological_process | 2.78E-03 | 2.26E-02 | 5.21 |
| GO:0019935 | cyclic-nucleotide-mediated signaling                                             | biological_process | 2.78E-03 | 2.26E-02 | 5.21 |

**Supplemental Table 5.** Top 30 KEGG pathways for genes targeted by 3 potential miRNAs biomarkers.

| Pathway ID             | Description                                            | <i>P</i> value | q value  | Count | Enrich factor |
|------------------------|--------------------------------------------------------|----------------|----------|-------|---------------|
| <i>hsa-miR-148a-3p</i> |                                                        |                |          |       |               |
| hsa04510               | Focal adhesion                                         | 1.08E-05       | 2.32E-04 | 18    | 3.42          |
| hsa04810               | Regulation of actin cytoskeleton                       | 8.53E-05       | 1.00E-03 | 17    | 3.02          |
| hsa05215               | Prostate cancer                                        | 6.15E-07       | 7.94E-05 | 13    | 5.55          |
| hsa04722               | Neurotrophin signaling pathway                         | 4.98E-04       | 4.29E-03 | 11    | 3.29          |
| hsa05221               | Acute myeloid leukemia                                 | 1.78E-06       | 1.15E-04 | 10    | 6.56          |
| hsa05214               | Glioma                                                 | 5.21E-06       | 2.24E-04 | 10    | 5.85          |
| hsa05211               | Renal cell carcinoma                                   | 1.04E-05       | 2.68E-04 | 10    | 5.43          |
| hsa05410               | Hypertrophic cardiomyopathy (HCM)                      | 4.86E-05       | 6.97E-04 | 10    | 4.58          |
| hsa05220               | Chronic myeloid leukemia                               | 8.40E-05       | 1.08E-03 | 9     | 4.69          |
| hsa04012               | ErbB signaling pathway                                 | 3.43E-04       | 3.69E-03 | 9     | 3.93          |
| hsa05414               | Dilated cardiomyopathy                                 | 4.47E-04       | 4.12E-03 | 9     | 3.8           |
| hsa05213               | Endometrial cancer                                     | 3.35E-05       | 6.18E-04 | 8     | 5.85          |
| hsa05223               | Non-small cell lung cancer                             | 4.48E-05       | 7.23E-04 | 8     | 5.63          |
| hsa05218               | Melanoma                                               | 3.47E-04       | 3.44E-03 | 8     | 4.28          |
| hsa04350               | TGF-beta signaling pathway                             | 1.25E-03       | 1.01E-02 | 8     | 3.58          |
| hsa04512               | ECM-receptor interaction                               | 1.25E-03       | 1.01E-02 | 8     | 3.58          |
| hsa04916               | Melanogenesis                                          | 4.00E-03       | 1.99E-02 | 8     | 3.01          |
| hsa04115               | p53 signaling pathway                                  | 1.37E-03       | 9.29E-03 | 7     | 3.86          |
| hsa05412               | Arrhythmogenic right ventricular cardiomyopathy (ARVC) | 2.12E-03       | 1.25E-02 | 7     | 3.6           |
| hsa04662               | B cell receptor signaling pathway                      | 2.31E-03       | 1.30E-02 | 7     | 3.55          |
| hsa04070               | Phosphatidylinositol signaling system                  | 2.94E-03       | 1.52E-02 | 7     | 3.41          |
| hsa05222               | Small cell lung cancer                                 | 4.96E-03       | 2.37E-02 | 7     | 3.13          |
| hsa00562               | Inositol phosphate metabolism                          | 2.08E-03       | 1.28E-02 | 6     | 4             |
| hsa05212               | Pancreatic cancer                                      | 6.46E-03       | 2.87E-02 | 6     | 3.26          |
| hsa04150               | mTOR signaling pathway                                 | 6.23E-03       | 2.87E-02 | 5     | 3.66          |
| hsa05210               | Colorectal cancer                                      | 1.43E-02       | 4.98E-02 | 5     | 3.07          |
| hsa04320               | Dorso-ventral axis formation                           | 1.28E-03       | 9.20E-03 | 4     | 6.08          |
| hsa05216               | Thyroid cancer                                         | 2.46E-03       | 1.32E-02 | 4     | 5.24          |
| hsa05219               | Bladder cancer                                         | 1.18E-02       | 4.34E-02 | 4     | 3.62          |
| hsa04710               | Circadian rhythm                                       | 7.26E-03       | 2.93E-02 | 3     | 4.96          |
| <i>hsa-miR-362-5p</i>  |                                                        |                |          |       |               |
| hsa04510               | Focal adhesion                                         | 7.37E-03       | 4.08E-02 | 3     | 5.53          |
| hsa04810               | Regulation of actin cytoskeleton                       | 9.31E-03       | 4.47E-02 | 3     | 5.16          |
| hsa04960               | Aldosterone-regulated sodium reabsorption              | 6.31E-04       | 4.54E-02 | 2     | 17.54         |
| hsa05223               | Non-small cell lung cancer                             | 1.30E-03       | 4.68E-02 | 2     | 13.64         |
| hsa00562               | Inositol phosphate metabolism                          | 1.52E-03       | 3.64E-02 | 2     | 12.93         |
| hsa05214               | Glioma                                                 | 2.21E-03       | 3.97E-02 | 2     | 11.33         |
| hsa04971               | Gastric acid secretion                                 | 3.18E-03       | 4.59E-02 | 2     | 9.96          |
| hsa04370               | VEGF signaling pathway                                 | 3.43E-03       | 4.12E-02 | 2     | 9.69          |



|                       |                                                        |          |          |   |      |
|-----------------------|--------------------------------------------------------|----------|----------|---|------|
| hsa04070              | Phosphatidylinositol signaling system                  | 3.69E-03 | 3.80E-02 | 2 | 9.45 |
| hsa04664              | Fc epsilon RI signaling pathway                        | 3.83E-03 | 3.44E-02 | 2 | 9.33 |
| hsa03008              | Ribosome biogenesis in eukaryotes                      | 4.10E-03 | 3.28E-02 | 2 | 9.1  |
| hsa03015              | mRNA surveillance pathway                              | 4.39E-03 | 3.16E-02 | 2 | 8.88 |
| hsa04012              | ErbB signaling pathway                                 | 5.01E-03 | 3.28E-02 | 2 | 8.47 |
| hsa04666              | Fc gamma R-mediated phagocytosis                       | 6.40E-03 | 3.84E-02 | 2 | 7.76 |
| hsa05146              | Amoebiasis                                             | 8.65E-03 | 4.45E-02 | 2 | 6.95 |
| hsa04270              | Vascular smooth muscle contraction                     | 1.11E-02 | 4.97E-02 | 2 | 6.35 |
| hsa04670              | Leukocyte transendothelial migration                   | 1.13E-02 | 4.79E-02 | 2 | 6.3  |
| <i>hsa-miR-194-5p</i> |                                                        |          |          |   |      |
| hsa04510              | Focal adhesion                                         | 1.65E-03 | 6.71E-02 | 9 | 3.27 |
| hsa04010              | MAPK signaling pathway                                 | 1.25E-02 | 2.18E-01 | 9 | 2.44 |
| hsa04120              | Ubiquitin mediated proteolysis                         | 4.81E-04 | 5.87E-02 | 8 | 4.19 |
| hsa04360              | Axon guidance                                          | 1.41E-03 | 8.58E-02 | 7 | 3.92 |
| hsa04350              | TGF-beta signaling pathway                             | 3.12E-03 | 9.52E-02 | 5 | 4.28 |
| hsa04114              | Oocyte meiosis                                         | 1.27E-02 | 1.94E-01 | 5 | 3.19 |
| hsa04722              | Neurotrophin signaling pathway                         | 2.08E-02 | 2.31E-01 | 5 | 2.86 |
| hsa04530              | Tight junction                                         | 2.55E-02 | 2.23E-01 | 5 | 2.74 |
| hsa04514              | Cell adhesion molecules (CAMs)                         | 2.82E-02 | 2.15E-01 | 5 | 2.68 |
| hsa04910              | Insulin signaling pathway                              | 3.00E-02 | 2.03E-01 | 5 | 2.64 |
| hsa04720              | Long-term potentiation                                 | 7.07E-03 | 1.72E-01 | 4 | 4.16 |
| hsa05412              | Arrhythmogenic right ventricular cardiomyopathy (ARVC) | 8.90E-03 | 1.81E-01 | 4 | 3.93 |
| hsa04512              | ECM-receptor interaction                               | 1.56E-02 | 2.12E-01 | 4 | 3.42 |
| hsa04012              | ErbB signaling pathway                                 | 1.71E-02 | 2.09E-01 | 4 | 3.35 |
| hsa04666              | Fc gamma R-mediated phagocytosis                       | 2.42E-02 | 2.46E-01 | 4 | 3.06 |
| hsa04916              | Melanogenesis                                          | 3.07E-02 | 1.97E-01 | 4 | 2.88 |
| hsa05131              | Shigellosis                                            | 2.44E-02 | 2.29E-01 | 3 | 3.52 |
| hsa05214              | Glioma                                                 | 2.85E-02 | 2.05E-01 | 3 | 3.36 |
| hsa05211              | Renal cell carcinoma                                   | 3.63E-02 | 2.21E-01 | 3 | 3.12 |
| hsa05218              | Melanoma                                               | 3.79E-02 | 2.20E-01 | 3 | 3.07 |
| hsa04520              | Adherens junction                                      | 4.15E-02 | 2.30E-01 | 3 | 2.99 |
| hsa04662              | B cell receptor signaling pathway                      | 4.52E-02 | 2.21E-01 | 3 | 2.91 |
| hsa04370              | VEGF signaling pathway                                 | 4.71E-02 | 2.21E-01 | 3 | 2.87 |
| hsa05410              | Hypertrophic cardiomyopathy (HCM)                      | 6.20E-02 | 2.61E-01 | 3 | 2.63 |
| hsa05219              | Bladder cancer                                         | 4.42E-02 | 2.24E-01 | 2 | 3.47 |
| hsa04930              | Type II diabetes mellitus                              | 6.19E-02 | 2.70E-01 | 2 | 3.03 |
| hsa05144              | Malaria                                                | 7.20E-02 | 2.93E-01 | 2 | 2.85 |
| hsa04150              | mTOR signaling pathway                                 | 7.55E-02 | 2.97E-01 | 2 | 2.8  |
| hsa04340              | Hedgehog signaling pathway                             | 9.05E-02 | 3.35E-01 | 2 | 2.6  |
| hsa04621              | NOD-like receptor signaling pathway                    | 1.03E-01 | 3.69E-01 | 2 | 2.47 |

**Supplementary Table 6.** The intersection between 3 potential miRNAs biomarkers and angiogenesis pathway genes.

| Systematic Name        | The intersected angiogenesis pathway genes                                                                                                                                                                                     | Number |
|------------------------|--------------------------------------------------------------------------------------------------------------------------------------------------------------------------------------------------------------------------------|--------|
| <i>hsa-miR-148a-3p</i> | MEOX2, ROBO1, COL4A1, NRP1, PNPLA6, ACVR1, STARD13, C1GALT1, E2F7, DICER1, F3, S1PR1, TEK, TGFB2, ITGA5, NRARP, KLF5, EPAS1, ROCK1, KLF4, EFNB2, SERPINE1, PTEN, PIK3CA, DDAH1, SULF1, VASH2, NR2E1, PTPRM, NAA15, MMP19, EGR3 | 32     |
| <i>hsa-miR-362-5p</i>  | CYP1B1, DLL1, PRKCA, PIK3CB                                                                                                                                                                                                    | 4      |
| <i>hsa-miR-194-5p</i>  | SLC12A6, PTGIS, ARHGAP24, NRP1, EFNB2, THBS1                                                                                                                                                                                   | 6      |

## Supplemental Materials

**Supplemental Figure 1** Signal distribution of miRNA microarray of blood samples. The middle line of the figure represents the median of the overall data. The yellow box contains 50% of the overall data, and this area is the Inter Quantile Range.

**Supplemental Figure 2** Heat map analysis of 12 differentially expressed miRNAs in PA-HSOS patients in cohort 1 by microarray.

**Supplemental Figure 3** Representative UPLC-DAD-MS chromatograms of *G. japonica* total alkaloid extracts. DAD data were acquired from 200-400 nm while MS data were acquired from m/z 50-650.

**Supplemental Figure 4** Blood levels of reported miRNAs candidates.

# Supplemental Figure 1

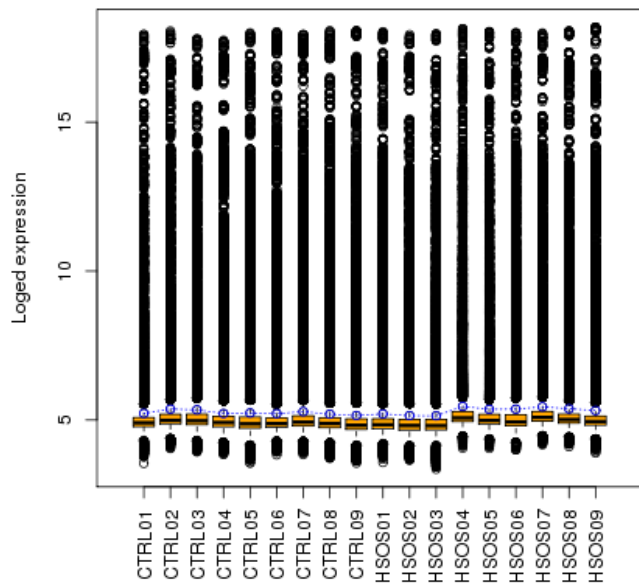



# Supplemental Figure 3

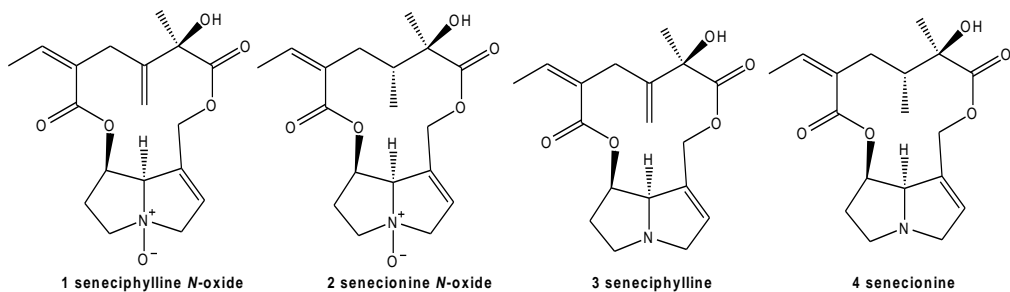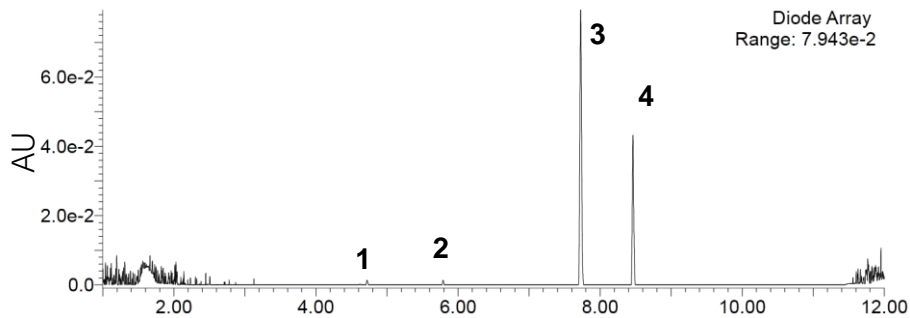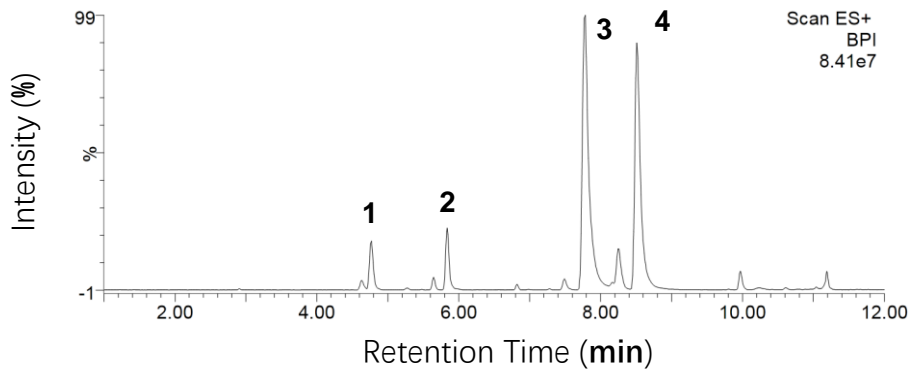

# Supplemental Figure 4

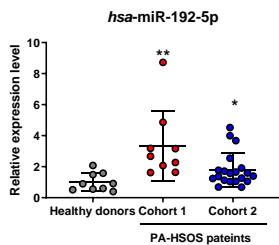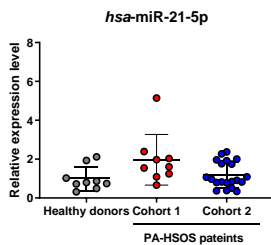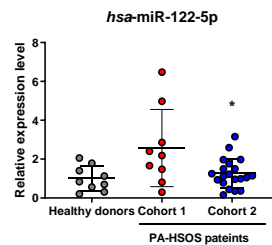

Supplement: datasheet1.pdf [file datasheet1.pdf]
